# Supplementary material
Source: publisher figshare collection journal article supplement (https://sage.figshare.com/ndownloader/files/22882148)
Supplement: Supplementary file 1 [file 22882148]

## Supplemental Material

### Interview script for the financial difficulty question (adapted from Brcic et al. 2011)<sup>1</sup>

Interviewer: “The next question is about your personal and household finances. As with previous questions, you can choose not to answer if you do not feel comfortable. The question is: **Do you ever have difficulty making ends meet at the end of the month?**”

Record participant response: “**Yes/no**”

If you observe the participant expressing difficulty understanding the question such as not understanding what “making ends meet” means or request clarification, the alternative question is: “**Do you ever have difficulty paying your bills at the end of the month?**”

The question also is not limited to any specific time period and can be as far back as the participant can remember.

### Reference:

1. Brcic V, Eberdt C and Kaczorowski J. Development of a tool to identify poverty in a family practice setting: a pilot study. *Int J Family Med* 2011; 2011: 812182.
